# Supplementary material for: Effects of metformin, acarbose, and sitagliptin monotherapy on gut microbiota in Zucker diabetic fatty rats
Source: PubMed Central journal article supplement — BMJ Open Diabetes Res Care. 2019 Sep 20;7(1):e000717. doi: 10.1136/bmjdrc-2019-000717 (PMC6777410; doi:10.1136/bmjdrc-2019-000717), 2019-09-20
Supplement: bmjdrc-2019-000717supp001.pdf [file bmjdrc-2019-000717supp001.pdf]

| Family                        | Genus                                  | OTU     | 1.1 | 1.2 | 1.3 | 1.4 | 2.1 | 2.2 | 2.3 | 2.4 | 3.1 | 3.2 | 3.3 | 3.4 | 4.1 | 4.2 | 4.3 | 4.4 | 5.1 | 5.2 | 5.3 | 5.4 | 6.1 | 6.2 | 6.3 | 6.4 | 7.1 | 7.2 | 7.3 | 7.4 | 8.1 | 8.2 | 8.3 | 8.4 | SUM  |     |     |     |
|-------------------------------|----------------------------------------|---------|-----|-----|-----|-----|-----|-----|-----|-----|-----|-----|-----|-----|-----|-----|-----|-----|-----|-----|-----|-----|-----|-----|-----|-----|-----|-----|-----|-----|-----|-----|-----|-----|------|-----|-----|-----|
| Lachnospiraceae               | unclassified_f_Lachnospiraceae         | OTU438  | 4   | 1   | 2   | 2   | 0   | 0   | 0   | 0   | 0   | 0   | 0   | 0   | 0   | 0   | 0   | 0   | 0   | 0   | 0   | 3   | 0   | 0   | 0   | 0   | 0   | 0   | 0   | 0   | 0   | 0   | 0   | 0   | 0    | 13  |     |     |
| Ruminococcaceae               | Ruminiclostridium                      | OTU75   | 0   | 2   | 2   | 3   | 0   | 0   | 0   | 0   | 0   | 0   | 0   | 0   | 0   | 0   | 0   | 0   | 0   | 0   | 0   | 1   | 0   | 0   | 0   | 0   | 0   | 0   | 0   | 0   | 0   | 0   | 0   | 0   | 0    | 0   | 10  |     |
| Clostridiales_vadinBB60_group | norank_f_Clostridiales_vadinBB60_group | OTU226  | 0   | 0   | 1   | 1   | 0   | 0   | 1   | 0   | 0   | 0   | 0   | 0   | 0   | 0   | 0   | 0   | 0   | 0   | 0   | 0   | 0   | 0   | 0   | 0   | 0   | 0   | 0   | 0   | 0   | 0   | 0   | 0   | 0    | 4   |     |     |
| Lachnospiraceae               | Lachnospiraceae_NK4136_group           | OTU101  | 0   | 0   | 0   | 29  | 0   | 0   | 0   | 0   | 0   | 0   | 0   | 0   | 0   | 0   | 0   | 0   | 0   | 0   | 0   | 0   | 0   | 0   | 0   | 0   | 0   | 0   | 0   | 0   | 0   | 0   | 0   | 0   | 0    | 29  |     |     |
| Lachnospiraceae               | Marvinbryantia                         | OTU3    | 15  | 10  | 11  | 5   | 0   | 0   | 0   | 37  | 2   | 1   | 1   | 1   | 0   | 0   | 0   | 0   | 0   | 5   | 3   | 0   | 0   | 3   | 6   | 3   | 2   | 1   | 6   | 3   | 4   | 5   | 44  | 5   | 14   | 187 |     |     |
| Lachnospiraceae               | Anaerostipes                           | OTU325  | 0   | 0   | 0   | 0   | 0   | 1   | 0   | 0   | 0   | 0   | 0   | 0   | 0   | 0   | 0   | 0   | 0   | 1   | 0   | 0   | 0   | 0   | 0   | 0   | 1   | 3   | 0   | 0   | 0   | 0   | 0   | 0   | 1    | 12  |     |     |
| Lachnospiraceae               | Eisenbergiella                         | OTU180  | 0   | 0   | 0   | 2   | 0   | 4   | 0   | 0   | 0   | 0   | 0   | 0   | 0   | 0   | 0   | 0   | 0   | 0   | 0   | 0   | 1   | 2   | 0   | 0   | 0   | 0   | 0   | 0   | 0   | 0   | 0   | 0   | 0    | 0   | 12  |     |
| Lachnospiraceae               | norank_f_Lachnospiraceae               | OTU102  | 0   | 0   | 3   | 3   | 1   | 0   | 0   | 0   | 0   | 0   | 0   | 0   | 0   | 0   | 0   | 0   | 0   | 0   | 0   | 1   | 1   | 0   | 0   | 0   | 0   | 0   | 0   | 0   | 0   | 0   | 0   | 0   | 0    | 12  |     |     |
| Ruminococcaceae               | [Eubacterium]_coprostanoligenes_group  | OTU210  | 0   | 0   | 0   | 1   | 0   | 3   | 2   | 1   | 0   | 1   | 0   | 1   | 0   | 0   | 0   | 0   | 0   | 0   | 0   | 0   | 0   | 0   | 0   | 0   | 0   | 0   | 0   | 0   | 0   | 0   | 0   | 0   | 0    | 2   | 15  |     |
| Ruminococcaceae               | Ruminococcus_1                         | OTU1613 | 0   | 0   | 0   | 0   | 1   | 0   | 0   | 0   | 0   | 0   | 0   | 0   | 0   | 0   | 0   | 0   | 0   | 0   | 0   | 0   | 1   | 0   | 0   | 0   | 0   | 0   | 0   | 0   | 0   | 0   | 10  | 3   | 6    | 0   | 22  |     |
| Family_XIII_AD3011_group      | unclassified_f_Lachnospiraceae         | OTU674  | 2   | 0   | 6   | 3   | 1   | 7   | 8   | 0   | 0   | 0   | 0   | 0   | 1   | 0   | 1   | 0   | 0   | 0   | 0   | 0   | 0   | 0   | 0   | 0   | 0   | 0   | 0   | 0   | 0   | 0   | 0   | 3   | 18   | 88  |     |     |
| Lachnospiraceae               | unclassified_f_Lachnospiraceae         | OTU293  | 0   | 2   | 0   | 0   | 0   | 2   | 2   | 1   | 5   | 1   | 0   | 0   | 3   | 0   | 0   | 0   | 0   | 0   | 1   | 1   | 1   | 1   | 2   | 0   | 0   | 0   | 1   | 0   | 3   | 1   | 0   | 0   | 0    | 29  |     |     |
| Ruminococcaceae               | Anaerotruncus                          | OTU79   | 0   | 3   | 1   | 7   | 0   | 0   | 0   | 2   | 4   | 1   | 1   | 1   | 1   | 3   | 1   | 7   | 6   | 1   | 1   | 1   | 1   | 1   | 0   | 0   | 0   | 0   | 0   | 0   | 0   | 0   | 0   | 2   | 2    | 54  |     |     |
| Lachnospiraceae               | Lachnospiraceae_NK4136_group           | OTU173  | 0   | 1   | 1   | 3   | 18  | 18  | 8   | 0   | 0   | 0   | 0   | 0   | 0   | 0   | 0   | 0   | 0   | 0   | 0   | 0   | 0   | 0   | 0   | 0   | 0   | 0   | 0   | 0   | 0   | 0   | 0   | 0   | 0    | 66  |     |     |
| unclassified_k_norank         | unclassified_k_norank                  | OTU379  | 0   | 0   | 0   | 0   | 0   | 0   | 1   | 0   | 1   | 0   | 0   | 0   | 2   | 1   | 0   | 0   | 0   | 0   | 0   | 0   | 0   | 0   | 0   | 0   | 0   | 0   | 0   | 0   | 0   | 0   | 0   | 0   | 0    | 8   |     |     |
| Lachnospiraceae               | unclassified_f_Lachnospiraceae         | OTU627  | 0   | 0   | 0   | 0   | 10  | 5   | 0   | 0   | 0   | 0   | 0   | 0   | 0   | 0   | 0   | 0   | 0   | 0   | 0   | 0   | 0   | 0   | 0   | 0   | 0   | 0   | 0   | 0   | 0   | 0   | 0   | 0   | 0    | 28  |     |     |
| Prevotellaceae                | Alloprevotella                         | OTU291  | 4   | 4   | 4   | 15  | 0   | 4   | 243 | 0   | 30  | 47  | 43  | 5   | 7   | 4   | 0   | 0   | 0   | 4   | 1   | 2   | 26  | 0   | 0   | 0   | 0   | 0   | 0   | 0   | 0   | 0   | 2   | 1   | 11   | 0   | 453 |     |
| Christensenellaceae           | Christensenellaceae_R-7_group          | OTU190  | 0   | 0   | 0   | 0   | 0   | 2   | 2   | 0   | 0   | 0   | 0   | 0   | 0   | 0   | 0   | 0   | 0   | 0   | 0   | 0   | 0   | 0   | 0   | 0   | 0   | 0   | 0   | 0   | 0   | 0   | 0   | 0   | 0    | 7   |     |     |
| Bacteroidales_S24-7_group     | norank_f_Bacteroidales_S24-7_group     | OTU201  | 92  | 125 | 61  | 122 | 233 | 311 | 235 | 38  | 108 | 93  | 67  | 26  | 85  | 85  | 90  | 175 | 90  | 45  | 13  | 253 | 16  | 88  | 24  | 47  | 15  | 76  | 53  | 191 | 87  | 166 | 19  | 100 | 3229 |     |     |     |
| Ruminococcaceae               | Ruminococcaceae_UCG-013                | OTU127  | 1   | 0   | 0   | 0   | 0   | 0   | 1   | 0   | 0   | 0   | 0   | 0   | 0   | 0   | 0   | 0   | 0   | 0   | 0   | 0   | 0   | 0   | 0   | 0   | 0   | 1   | 1   | 0   | 0   | 0   | 0   | 1   | 6    |     |     |     |
| Lachnospiraceae               | unclassified_f_Lachnospiraceae         | OTU590  | 196 | 141 | 184 | 95  | 7   | 18  | 12  | 253 | 13  | 12  | 3   | 50  | 10  | 8   | 3   | 2   | 63  | 18  | 34  | 21  | 119 | 148 | 116 | 141 | 62  | 1   | 1   | 1   | 1   | 0   | 0   | 0   | 0    | 1   | 6   |     |
| Lachnospiraceae               | unclassified_f_Lachnospiraceae         | OTU111  | 0   | 2   | 0   | 3   | 0   | 1   | 0   | 1   | 0   | 0   | 0   | 0   | 0   | 0   | 0   | 0   | 0   | 0   | 0   | 0   | 0   | 0   | 0   | 0   | 0   | 0   | 0   | 0   | 0   | 0   | 0   | 0   | 0    | 9   |     |     |
| Lachnospiraceae               | [Ruminococcus]_gaurvainii_group        | OTU564  | 59  | 86  | 75  | 76  | 23  | 16  | 7   | 215 | 21  | 51  | 103 | 44  | 186 | 72  | 26  | 54  | 11  | 5   | 19  | 3   | 30  | 75  | 11  | 64  | 24  | 50  | 17  | 52  | 25  | 55  | 60  | 24  | 1639 |     |     |     |
| Bacteroidales_S24-7_group     | norank_f_Bacteroidales_S24-7_group     | OTU114  | 17  | 15  | 2   | 22  | 12  | 0   | 20  | 3   | 0   | 5   | 3   | 3   | 0   | 2   | 1   | 0   | 0   | 1   | 3   | 1   | 8   | 0   | 5   | 3   | 8   | 1   | 5   | 3   | 7   | 3   | 1   | 2   | 159  |     |     |     |
| Lachnospiraceae               | unclassified_f_Lachnospiraceae         | OTU503  | 0   | 1   | 5   | 0   | 0   | 2   | 0   | 0   | 2   | 0   | 0   | 0   | 0   | 0   | 0   | 0   | 0   | 0   | 0   | 2   | 17  | 0   | 99  | 0   | 0   | 0   | 0   | 0   | 0   | 0   | 0   | 0   | 0    | 0   | 148 |     |
| Erysipelotrichaceae           | Erysipelatoclostridium                 | OTU262  | 0   | 0   | 0   | 0   | 0   | 0   | 1   | 4   | 0   | 0   | 0   | 0   | 0   | 0   | 0   | 0   | 0   | 0   | 0   | 0   | 0   | 0   | 0   | 0   | 0   | 0   | 0   | 0   | 0   | 0   | 0   | 0   | 0    | 18  |     |     |
| norank_o_Mollicutes_RF9       | norank_o_Mollicutes_RF9                | OTU476  | 0   | 0   | 0   | 0   | 0   | 0   | 0   | 1   | 0   | 0   | 0   | 0   | 0   | 0   | 0   | 0   | 0   | 0   | 0   | 0   | 0   | 0   | 0   | 0   | 0   | 0   | 0   | 0   | 0   | 0   | 0   | 0   | 0    | 41  |     |     |
| Christensenellaceae           | Christensenellaceae_R-7_group          | OTU468  | 76  | 0   | 26  | 60  | 213 | 125 | 47  | 147 | 123 | 1   | 4   | 20  | 56  | 29  | 13  | 48  | 75  | 84  | 33  | 89  | 134 | 711 | 78  | 96  | 119 | 319 | 44  | 252 | 3   | 14  | 160 | 63  | 3262 |     |     |     |
| Lachnospiraceae               | unclassified_f_Lachnospiraceae         | OTU506  | 1   | 4   | 2   | 10  | 2   | 7   | 4   | 4   | 0   | 0   | 0   | 2   | 1   | 1   | 0   | 1   | 4   | 4   | 2   | 2   | 16  | 2   | 2   | 1   | 7   | 1   | 10  | 1   | 2   | 1   | 2   | 1   | 4    | 99  |     |     |
| Erysipelotrichaceae           | Faecalibaculum                         | OTU88   | 22  | 25  | 52  | 7   | 14  | 2   | 2   | 4   | 1   | 3   | 3   | 1   | 8   | 0   | 0   | 0   | 9   | 7   | 5   | 2   | 1   | 0   | 0   | 1   | 0   | 2   | 3   | 1   | 0   | 1   | 0   | 0   | 1    | 182 |     |     |
| Ruminococcaceae               | Ruminococcus_2                         | OTU372  | 0   | 0   | 0   | 0   | 0   | 1   | 0   | 0   | 122 | 121 | 100 | 54  | 82  | 51  | 60  | 32  | 0   | 0   | 0   | 0   | 0   | 0   | 1   | 0   | 0   | 0   | 0   | 0   | 0   | 0   | 0   | 0   | 0    | 0   | 1   | 632 |
| Ruminococcaceae               | unclassified_f_Ruminococcaceae         | OTU113  | 0   | 0   | 0   | 2   | 0   | 0   | 1   | 0   | 0   | 0   | 0   | 0   | 0   | 0   | 0   | 0   | 0   | 0   | 1   | 1   | 0   | 0   | 0   | 0   | 0   | 0   | 0   | 0   | 0   | 0   | 0   | 0   | 0    | 10  |     |     |
| Ruminococcaceae               | unclassified_f_Ruminococcaceae         | OTU111  | 0   | 2   | 0   | 3   | 0   | 1   | 0   | 1   | 0   | 0   | 0   | 0   | 0   | 0   | 0   | 0   | 0   | 0   | 0   | 0   | 0   | 0   | 0   | 0   | 0   | 0   | 0   | 0   | 0   | 0   | 0   | 0   | 0    | 9   |     |     |
| Christensenellaceae           | Christensenellaceae_R-7_group          | OTU100  | 1   | 1   | 0   | 2   | 1   | 5   | 1   | 2   | 0   | 0   | 0   | 0   | 0   | 0   | 0   | 0   | 0   | 0   | 1   | 1   | 0   | 0   | 1   | 0   | 0   | 0   | 0   | 0   | 0   | 0   | 0   | 0   | 0    | 18  |     |     |
| Ruminococcaceae               | Anaerotruncus                          | OTU351  | 0   | 0   | 1   | 0   | 0   | 1   | 0   | 0   | 1   | 0   | 0   | 0   | 0   | 0   | 0   | 0   | 0   | 0   | 0   | 0   | 0   | 0   | 0   | 0   | 0   | 0   | 0   | 0   | 0   | 0   | 0   | 0   | 0    | 5   |     |     |
| Defluviitaleaceae             | Defluviitaleaceae_UCG-011              | OTU90   | 0   | 0   | 0   | 3   | 0   | 0   | 2   | 1   | 0   | 0   | 0   | 0   | 0   | 0   | 0   | 0   | 0   | 0   | 0   | 0   | 0   | 0   | 0   | 0   | 1   | 0   | 0   | 0   | 0   | 0   | 0   | 0   | 0    | 9   |     |     |
| Thermoanaerobacteraceae       | Gelria                                 | OTU221  | 0   | 0   | 1   | 0   | 4   | 1   | 0   | 1   | 0   | 0   | 0   | 0   | 0   | 0   | 0   | 0   | 0   | 0   | 0   | 0   | 0   | 0   | 0   | 0   | 0   | 0   | 0   | 0   | 0   | 0   | 0   | 0   | 0    | 8   |     |     |
| Bacteroidales_S24-7_group     | norank_f_Bacteroidales_S24-7_group     | OTU408  | 0   | 0   | 0   | 0   | 0   | 0   | 0   | 1   | 0   | 0   | 0   | 0   | 0   | 0   | 0   | 0   | 0   | 0   | 0   | 0   | 0   | 0   | 0   | 0   | 0   | 0   | 0   | 0   | 0   | 0   | 0   | 0   | 0    | 8   |     |     |
| Bacteroidales_S24-7_group     | norank_f_Bacteroidales_S24-7_group     | OTU252  | 22  | 12  | 9   | 32  | 118 | 16  | 103 | 23  | 17  | 1   | 2   | 0   | 12  | 1   | 2   | 3   | 5   | 86  | 67  | 99  | 10  | 12  | 9   | 6   | 7   | 25  | 17  | 32  | 1   | 4   | 1   | 2   | 2    | 789 |     |     |
| Lactobacillaceae              | Lactobacillus                          | OTU633  | 14  | 33  | 54  | 20  | 29  | 83  | 55  | 68  | 0   | 1   | 0   | 1   | 4   | 12  | 0   | 1   | 14  | 7   | 3   | 8   | 70  | 20  | 19  | 10  | 15  | 24  | 9   | 26  | 9   | 13  | 16  | 16  | 654  |     |     |     |
| unclassified_p_Firmicutes     | unclassified_p_Firmicutes              | OTU520  | 22  | 28  | 20  | 6   | 11  | 5   | 6   | 0   | 0   | 1   | 1   | 2   | 18  | 2   | 4   | 6   | 7   | 0   | 2   | 2   | 15  | 19  | 0   | 1   | 4   | 4   | 4   | 8   | 5   | 2   | 4   | 1   | 210  |     |     |     |
| norank_o_Mollicutes_RF9       | norank_o_Mollicutes_RF9                | OTU224  |     |     |     |     |     |     |     |     |     |     |     |     |     |     |     |     |     |     |     |     |     |     |     |     |     |     |     |     |     |     |     |     |      |     |     |     |

|                               |                                        |        |     |     |     |     |    |     |    |    |     |     |     |     |    |     |    |    |     |     |     |     |     |     |     |     |     |     |     |     |     |     |     |     |      |     |
|-------------------------------|----------------------------------------|--------|-----|-----|-----|-----|----|-----|----|----|-----|-----|-----|-----|----|-----|----|----|-----|-----|-----|-----|-----|-----|-----|-----|-----|-----|-----|-----|-----|-----|-----|-----|------|-----|
| Coriobacteriaceae             | unclassified_f_Coriobacteriaceae       | OTU655 | 2   | 0   | 2   | 0   | 2  | 0   | 0  | 2  | 0   | 0   | 0   | 0   | 1  | 0   | 0  | 0  | 1   | 0   | 2   | 1   | 0   | 0   | 1   | 0   | 2   | 1   | 3   | 0   | 1   | 2   | 2   | 2   | 27   |     |
| Erysipelotrichaceae           | Candidatus_Stoquefichus                | OTU530 | 0   | 0   | 0   | 1   | 0  | 0   | 3  | 1  | 1   | 2   | 2   | 8   | 2  | 2   | 1  | 1  | 0   | 0   | 0   | 2   | 10  | 0   | 10  | 0   | 3   | 0   | 8   | 3   | 5   | 4   | 1   | 70  |      |     |
| Lachnospiraceae               | unclassified_f_Lachnospiraceae         | OTU58  | 0   | 0   | 6   | 2   | 0  | 4   | 1  | 2  | 1   | 0   | 1   | 0   | 1  | 0   | 0  | 1  | 1   | 0   | 0   | 1   | 0   | 0   | 1   | 0   | 0   | 0   | 0   | 1   | 2   | 0   | 26  |     |      |     |
| Lachnospiraceae               | norank_f_Lachnospiraceae               | OTU337 | 0   | 0   | 0   | 0   | 3  | 0   | 0  | 0  | 0   | 0   | 0   | 1   | 0  | 0   | 0  | 0  | 0   | 0   | 0   | 0   | 0   | 0   | 0   | 0   | 0   | 0   | 0   | 0   | 0   | 0   | 6   |     |      |     |
| Bacteroidales_S24-7_group     | norank_f_Bacteroidales_S24-7_group     | OTU202 | 12  | 25  | 11  | 58  | 73 | 38  | 73 | 5  | 69  | 32  | 42  | 17  | 43 | 43  | 15 | 39 | 8   | 11  | 1   | 12  | 9   | 14  | 14  | 3   | 3   | 0   | 4   | 8   | 5   | 16  | 3   | 13  | 719  |     |
| Erysipelotrichaceae           | Faecalitalea                           | OTU47  | 0   | 1   | 0   | 1   | 0  | 11  | 0  | 0  | 1   | 1   | 0   | 3   | 1  | 0   | 0  | 5  | 2   | 0   | 3   | 0   | 0   | 0   | 2   | 0   | 2   | 0   | 1   | 1   | 3   | 0   | 0   | 39  |      |     |
| Peptococcaceae                | norank_f_Peptococcaceae                | OTU473 | 0   | 5   | 5   | 2   | 1  | 0   | 0  | 1  | 3   | 2   | 0   | 0   | 0  | 1   | 5  | 4  | 9   | 4   | 40  | 1   | 8   | 10  | 1   | 1   | 5   | 15  | 0   | 4   | 2   | 10  | 16  | 159 |      |     |
| norank_o_Mollucutes_RF9       | norank_o_Mollucutes_RF9                | OTU640 | 2   | 0   | 0   | 0   | 1  | 3   | 17 | 24 | 1   | 0   | 2   | 0   | 0  | 0   | 1  | 0  | 0   | 1   | 0   | 45  | 0   | 33  | 0   | 4   | 3   | 3   | 5   | 124 | 9   | 5   | 5   | 288 |      |     |
| Lachnospiraceae               | Marvinbryantia                         | OTU663 | 12  | 7   | 10  | 8   | 1  | 7   | 2  | 49 | 5   | 6   | 30  | 10  | 26 | 6   | 10 | 58 | 183 | 35  | 47  | 5   | 30  | 68  | 12  | 19  | 136 | 155 | 26  | 91  | 1   | 7   | 56  | 11  | 1129 |     |
| Bacteroidales_S24-7_group     | norank_f_Bacteroidales_S24-7_group     | OTU208 | 0   | 0   | 0   | 0   | 3  | 4   | 11 | 1  | 0   | 0   | 0   | 0   | 0  | 0   | 0  | 0  | 0   | 1   | 0   | 9   | 0   | 0   | 0   | 0   | 0   | 0   | 0   | 0   | 0   | 0   | 0   | 0   | 29   |     |
| Bacteroidales_S24-7_group     | norank_f_Bacteroidales_S24-7_group     | OTU335 | 1   | 1   | 0   | 6   | 0  | 0   | 0  | 0  | 1   | 3   | 5   | 0   | 0  | 1   | 0  | 0  | 0   | 0   | 0   | 0   | 2   | 0   | 0   | 0   | 0   | 0   | 0   | 0   | 0   | 0   | 0   | 0   | 20   |     |
| Ruminococcaceae               | Ruminococcaceae_UCG-005                | OTU194 | 0   | 7   | 0   | 3   | 1  | 0   | 0  | 0  | 0   | 0   | 0   | 0   | 0  | 0   | 0  | 0  | 0   | 0   | 0   | 0   | 0   | 0   | 0   | 0   | 0   | 0   | 0   | 0   | 0   | 0   | 0   | 11  |      |     |
| Ruminococcaceae               | [Eubacterium]_coprostanoligenes_group  | OTU461 | 0   | 0   | 0   | 0   | 11 | 96  | 14 | 0  | 0   | 0   | 0   | 0   | 51 | 0   | 2  | 19 | 0   | 0   | 31  | 0   | 38  | 1   | 53  | 2   | 8   | 1   | 0   | 0   | 0   | 8   | 102 | 437 |      |     |
| unclassified_k_norank         | unclassified_k_norank                  | OTU423 | 8   | 5   | 18  | 3   | 4  | 11  | 3  | 3  | 1   | 5   | 1   | 3   | 5  | 5   | 5  | 2  | 16  | 21  | 18  | 6   | 4   | 6   | 10  | 12  | 36  | 20  | 24  | 11  | 15  | 7   | 16  | 320 |      |     |
| Ruminococcaceae               | Ruminococcaceae_UCG-005                | OTU573 | 6   | 8   | 9   | 1   | 4  | 3   | 6  | 5  | 17  | 5   | 8   | 10  | 10 | 2   | 4  | 12 | 9   | 2   | 8   | 6   | 10  | 1   | 1   | 4   | 7   | 1   | 5   | 0   | 2   | 4   | 5   | 185 |      |     |
| Lachnospiraceae               | Lachnospiraceae                        | OTU183 | 6   | 4   | 4   | 25  | 13 | 38  | 10 | 6  | 2   | 5   | 0   | 5   | 10 | 5   | 1  | 2  | 0   | 23  | 12  | 11  | 13  | 52  | 34  | 11  | 17  | 3   | 9   | 31  | 55  | 3   | 14  | 0   | 3    | 417 |
| Ruminococcaceae               | [Eubacterium]_coprostanoligenes_group  | OTU338 | 18  | 2   | 11  | 48  | 7  | 57  | 2  | 1  | 64  | 79  | 72  | 16  | 14 | 18  | 0  | 0  | 74  | 12  | 23  | 116 | 10  | 4   | 0   | 17  | 10  | 17  | 46  | 16  | 23  | 0   | 1   | 778 |      |     |
| norank_o_Gastranaerophilales  | norank_o_Gastranaerophilales           | OTU153 | 0   | 0   | 0   | 0   | 1  | 0   | 2  | 0  | 0   | 0   | 0   | 0   | 0  | 0   | 0  | 0  | 0   | 0   | 1   | 0   | 0   | 0   | 0   | 0   | 0   | 0   | 0   | 0   | 0   | 0   | 0   | 11  |      |     |
| Desulfuobirionaceae           | Desulfuobirion                         | OTU149 | 0   | 1   | 0   | 53  | 9  | 33  | 54 | 24 | 0   | 0   | 0   | 0   | 0  | 0   | 0  | 0  | 0   | 0   | 0   | 0   | 0   | 0   | 0   | 0   | 0   | 29  | 1   | 14  | 7   | 0   | 0   | 0   | 225  |     |
| Lactobacillaceae              | Lactobacillus                          | OTU545 | 53  | 48  | 194 | 22  | 89 | 157 | 83 | 91 | 1   | 12  | 5   | 8   | 6  | 9   | 1  | 1  | 126 | 175 | 104 | 69  | 100 | 98  | 136 | 95  | 192 | 85  | 142 | 77  | 206 | 88  | 147 | 197 | 2817 |     |
| Ruminococcaceae               | Ruminococcaceae_UCG-004                | OTU658 | 0   | 1   | 0   | 0   | 0  | 0   | 0  | 0  | 0   | 0   | 0   | 0   | 0  | 0   | 0  | 0  | 0   | 0   | 0   | 0   | 0   | 0   | 0   | 0   | 0   | 0   | 0   | 0   | 0   | 1   | 42  | 0   | 44   |     |
| Ruminococcaceae               | Ruminococcaceae_UCG-014                | OTU63  | 45  | 39  | 16  | 15  | 4  | 22  | 5  | 1  | 169 | 248 | 393 | 96  | 24 | 270 | 0  | 24 | 155 | 5   | 10  | 37  | 22  | 15  | 256 | 18  | 198 | 4   | 547 | 445 | 710 | 48  | 3   | 153 | 3997 |     |
| Lactobacillaceae              | Lactobacillus                          | OTU585 | 47  | 13  | 12  | 3   | 1  | 10  | 7  | 8  | 1   | 4   | 7   | 5   | 0  | 0   | 0  | 0  | 11  | 23  | 24  | 9   | 29  | 29  | 14  | 27  | 22  | 20  | 23  | 20  | 19  | 29  | 22  | 21  | 1667 |     |
| Erysipelotrichaceae           | unclassified_f_Erysipelotrichaceae     | OTU602 | 1   | 1   | 3   | 0   | 3  | 8   | 0  | 3  | 0   | 0   | 0   | 1   | 0  | 0   | 0  | 0  | 1   | 1   | 1   | 5   | 4   | 5   | 1   | 3   | 1   | 7   | 11  | 4   | 2   | 1   | 5   | 73  |      |     |
| Lachnospiraceae               | Blautia                                | OTU19  | 18  | 50  | 23  | 59  | 3  | 0   | 9  | 67 | 19  | 4   | 6   | 13  | 50 | 6   | 1  | 6  | 30  | 9   | 17  | 11  | 39  | 18  | 8   | 17  | 52  | 58  | 11  | 11  | 1   | 7   | 62  | 9   | 694  |     |
| Lachnospiraceae               | [Eubacterium]_xylophilum_group         | OTU622 | 5   | 106 | 26  | 211 | 5  | 16  | 25 | 21 | 2   | 0   | 1   | 2   | 0  | 15  | 2  | 5  | 6   | 2   | 18  | 12  | 4   | 11  | 1   | 3   | 3   | 28  | 36  | 24  | 5   | 6   | 23  | 8   | 632  |     |
| Clostridiales_vadinBB60_group | norank_f_Clostridiales_vadinBB60_group | OTU80  | 0   | 0   | 1   | 0   | 0  | 0   | 1  | 0  | 0   | 0   | 0   | 0   | 0  | 0   | 0  | 0  | 0   | 0   | 0   | 0   | 0   | 0   | 0   | 0   | 0   | 0   | 0   | 0   | 0   | 0   | 1   | 0   | 3    |     |
| Ruminococcaceae               | Ruminococcaceae_UCG-002                | OTU37  | 0   | 5   | 1   | 0   | 0  | 0   | 0  | 0  | 0   | 0   | 0   | 0   | 0  | 1   | 0  | 0  | 0   | 0   | 0   | 0   | 0   | 0   | 0   | 0   | 0   | 0   | 0   | 0   | 0   | 0   | 0   | 0   | 13   |     |
| Ruminococcaceae               | Ruminococcaceae_UCG-005                | OTU118 | 1   | 0   | 0   | 0   | 0  | 0   | 0  | 1  | 0   | 0   | 0   | 0   | 0  | 0   | 0  | 0  | 0   | 0   | 0   | 0   | 0   | 1   | 1   | 0   | 0   | 0   | 0   | 0   | 0   | 0   | 0   | 0   | 0    | 7   |
| Ruminococcaceae               | Ruminococcaceae_UCG-005                | OTU673 | 48  | 15  | 12  | 13  | 8  | 11  | 3  | 40 | 13  | 12  | 0   | 18  | 5  | 16  | 0  | 8  | 38  | 11  | 23  | 9   | 23  | 22  | 18  | 25  | 23  | 82  | 36  | 56  | 36  | 43  | 106 | 83  | 856  |     |
| Rikenellaceae                 | Alistipes                              | OTU283 | 3   | 15  | 1   | 16  | 1  | 3   | 13 | 5  | 0   | 0   | 0   | 0   | 0  | 0   | 0  | 0  | 0   | 0   | 0   | 0   | 1   | 1   | 1   | 0   | 0   | 2   | 1   | 0   | 0   | 0   | 0   | 0   | 64   |     |
| Bacteroidales_S24-7_group     | norank_f_Bacteroidales_S24-7_group     | OTU144 | 2   | 4   | 6   | 3   | 2  | 0   | 0  | 0  | 5   | 6   | 5   | 0   | 1  | 1   | 0  | 0  | 0   | 2   | 1   | 3   | 2   | 2   | 4   | 0   | 0   | 0   | 0   | 1   | 1   | 3   | 0   | 1   | 55   |     |
| Lactobacillaceae              | Lactobacillus                          | OTU333 | 30  | 12  | 32  | 1   | 6  | 6   | 3  | 13 | 11  | 42  | 30  | 32  | 57 | 42  | 17 | 17 | 17  | 18  | 15  | 2   | 29  | 15  | 20  | 26  | 27  | 5   | 12  | 11  | 8   | 12  | 15  | 16  | 599  |     |
| Coriobacteriaceae             | Lactobacillus                          | OTU52  | 7   | 24  | 5   | 21  | 11 | 1   | 14 | 6  | 0   | 1   | 0   | 0   | 0  | 0   | 0  | 0  | 1   | 6   | 0   | 0   | 3   | 0   | 0   | 0   | 0   | 1   | 4   | 2   | 0   | 1   | 0   | 3   | 112  |     |
| Bacteroidales_S24-7_group     | norank_f_Bacteroidales_S24-7_group     | OTU392 | 33  | 7   | 33  | 21  | 0  | 0   | 0  | 0  | 21  | 30  | 50  | 116 | 43 | 7   | 29 | 86 | 2   | 5   | 2   | 9   | 1   | 0   | 0   | 0   | 0   | 4   | 0   | 5   | 3   | 0   | 1   | 0   | 511  |     |
| unclassified_p_Firmicutes     | unclassified_p_Firmicutes              | OTU8   | 6   | 27  | 8   | 12  | 12 | 13  | 5  | 36 | 1   | 4   | 6   | 2   | 5  | 6   | 6  | 5  | 10  | 4   | 7   | 14  | 18  | 5   | 16  | 7   | 4   | 3   | 2   | 0   | 0   | 4   | 4   | 252 |      |     |
| Ruminococcaceae               | Anaerotruncus                          | OTU81  | 0   | 1   | 0   | 0   | 2  | 0   | 0  | 0  | 0   | 0   | 0   | 0   | 0  | 0   | 0  | 0  | 0   | 0   | 0   | 0   | 0   | 0   | 0   | 0   | 0   | 0   | 0   | 0   | 0   | 0   | 0   | 1   | 0    | 5   |
| Ruminococcaceae               | Ruminococcaceae                        | OTU403 | 0   | 2   | 1   | 3   | 12 | 23  | 10 | 2  | 7   | 0   | 1   | 2   | 1  | 4   | 1  | 3  | 1   | 0   | 6   | 5   | 0   | 0   | 3   | 1   | 0   | 0   | 0   | 0   | 1   | 10  | 7   | 0   | 1    | 107 |
| Ruminococcaceae               | Candidatus_Soleaferrea                 | OTU565 | 4   | 1   | 10  | 1   | 4  | 3   | 14 | 18 | 1   | 2   | 1   | 2   | 2  | 1   | 1  | 0  | 3   | 1   | 5   | 2   | 1   | 4   | 2   | 2   | 8   | 3   | 1   | 9   | 2   | 9   | 4   | 5   | 126  |     |
| Lactobacillaceae              | Lactobacillus                          | OTU159 | 1   | 1   | 4   | 0   | 0  | 8   | 1  | 1  | 8   | 7   | 1   | 1   | 3  | 1   | 0  | 2  | 1   | 2   | 3   | 1   | 7   | 5   | 9   | 6   | 3   | 0   | 3   | 3   | 3   | 5   | 3   | 1   | 94   |     |
| Bacteroidales_S24-7_group     | norank_f_Bacteroidales_S24-7_group     | OTU555 | 8   | 32  | 11  | 19  | 23 | 1   | 28 | 6  | 1   | 0   | 1   | 0   | 1  | 0   | 0  | 0  | 1   | 1   | 0   | 0   | 0   | 13  | 4   | 0   | 6   | 0   | 21  | 9   | 3   | 5   | 12  | 1   | 14   | 221 |
| Lactobacillaceae              | Lactobacillus                          | OTU205 | 245 | 16  | 146 | 9   | 16 | 54  | 7  | 16 | 14  | 68  | 27  | 34  | 95 | 33  | 61 | 43 | 40  | 338 | 201 | 107 | 51  | 189 | 259 | 211 | 415 | 68  | 226 | 184 | 351 | 170 | 148 | 130 | 3972 |     |
| unclassified_p_Firmicutes     | unclassified_p_Firmicutes              | OTU133 | 0   | 9   | 1   | 3   | 23 | 13  | 12 | 25 | 0   | 0   | 0   | 0   | 0  | 0   | 0  | 0  | 0   | 0   | 0   | 0   | 13  | 7   | 3   | 1   | 1   | 0   | 1   | 0   | 1   | 0   | 1   | 1   | 115  |     |
| Lactobacillaceae              | Bacteroides                            | OTU241 | 0   | 0   | 0   | 0   | 11 | 0   | 16 | 2  | 0   | 0   | 0   | 0   | 0  | 1   | 0  | 0  | 0   | 0   | 0   | 0   | 0   | 0   | 0   | 0   | 0   | 0   | 0   | 0   | 0   | 0   | 0   | 0   | 30   |     |
| Christensenellaceae           | Christensenella                        | OTU27  | 0   | 0   | 0   | 0   | 1  | 0   | 0  | 0  | 0   | 0   | 0   | 0   | 0  | 0   | 0  | 0  | 0   | 0   | 0   | 0   | 0   | 0   | 0   | 0   | 0   | 0   | 0   | 0   | 0   | 0   | 0   | 1   | 4    | 0   |
| Ruminococcaceae               | Anaerotruncus                          | OTU445 | 0   | 0   | 0   | 0   | 0  | 0   | 1  | 0  | 0   | 0   | 0   | 0   | 0  | 0   | 0  | 0  | 0   | 0   | 0   | 0   | 0   | 0   | 0   | 0   | 0   | 0   | 0   | 0   | 0   | 0   | 0   | 0   | 5    |     |
| Lachnospiraceae               | unclassified_f_Lachnospiraceae         | OTU589 | 0   | 3   | 0   | 0   | 1  | 6   | 0  | 0  | 0   | 0   | 0   | 0   | 0  | 1   | 0  | 0  | 0   | 0   | 0   | 0   | 1   | 1   | 0   | 0   | 0   | 0   | 1   | 7   | 2   | 1   | 6   | 38  |      |     |
| Bacteroidales_S24-7_group     | norank_f_Bacteroidales_S24-7_group     | OTU246 | 0   | 0   | 0   | 0   | 0  | 0   | 3  | 0  | 0   | 0   | 0   | 0   | 0  | 1   | 0  | 0  | 0   | 0   | 0   | 0   | 0   | 0   | 0   | 0   | 0   | 0   | 0   | 0   | 0   | 0   | 0   | 0   | 3    | 9   |
| Ruminococcaceae               | norank_f_Ruminococcaceae               | OTU400 | 3   | 11  | 6   | 2   | 2  | 0   | 5  | 16 | 8   | 16  | 17  | 0   | 24 | 7   | 5  | 2  | 7   | 2   | 2   | 3   | 3   | 0   | 0   | 1   | 4   | 2   | 9   | 1   | 4   | 5   | 1   | 170 |      |     |
| Peptococcaceae                | norank_f_Peptococcaceae                | OTU657 | 0   | 0   | 2   | 6   | 6  | 11  | 2  | 8  | 0   | 0   | 0   | 2   | 0  | 1   | 0  | 0  | 0   | 0   | 0   | 0   | 2   | 1   | 1   | 1   | 1   | 1   | 1   | 2   | 1   | 2   |     |     |      |     |
