# Supplementary figures and images for: Effects of metformin, acarbose, and sitagliptin monotherapy on gut microbiota in Zucker diabetic fatty rats
Source: PubMed Central journal article supplement — BMJ Open Diabetes Res Care. 2019 Sep 20;7(1):e000717. doi: 10.1136/bmjdrc-2019-000717 (PMC6777410; doi:10.1136/bmjdrc-2019-000717), 2019-09-20

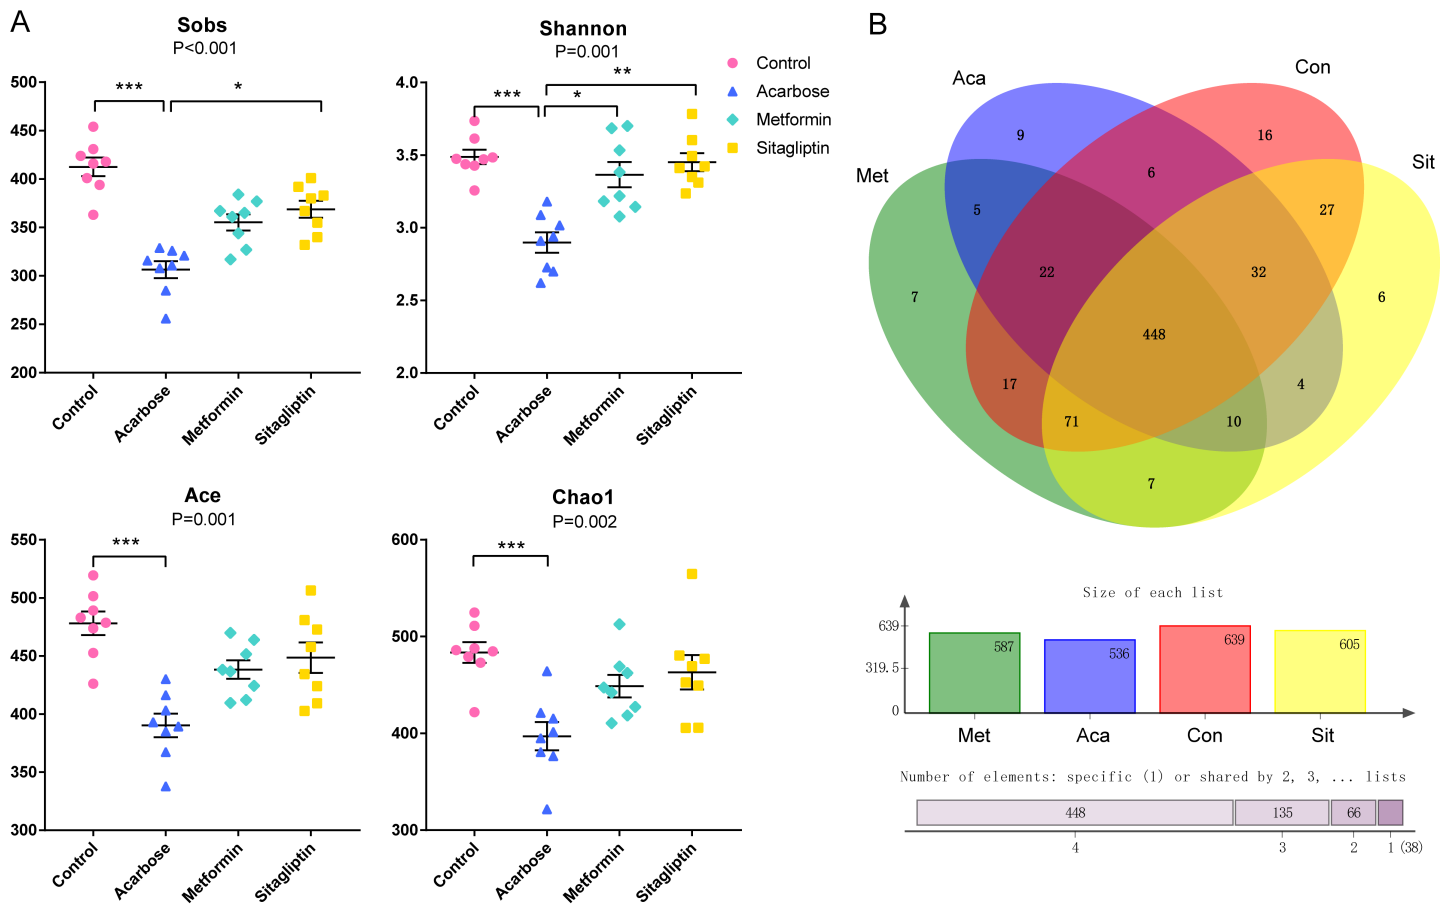

Fig. S1

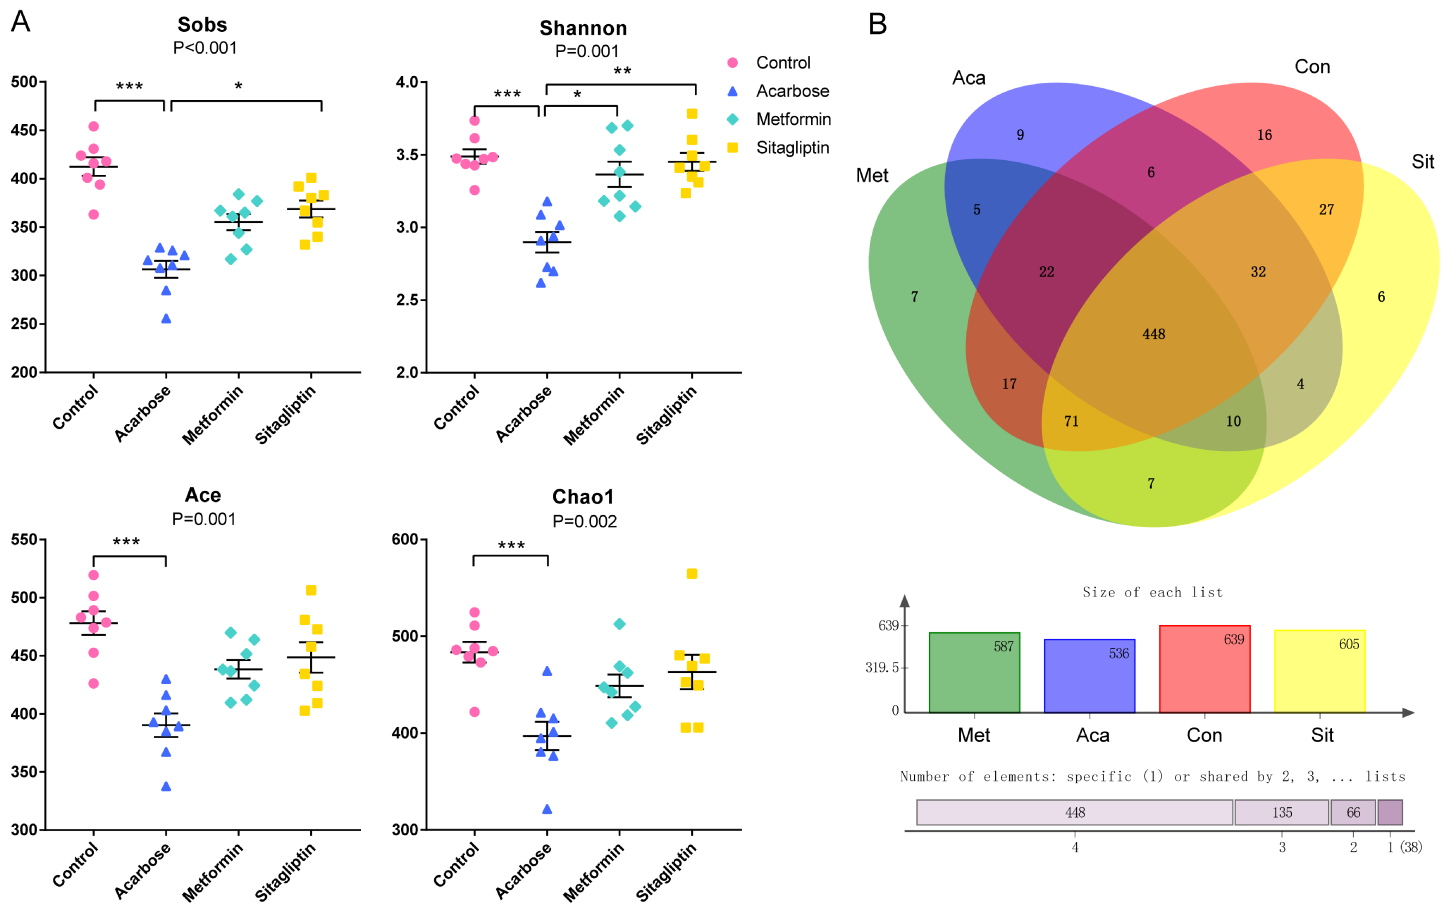

Supplement: bmjdrc-2019-000717supp002.pdf [file bmjdrc-2019-000717supp002.pdf]

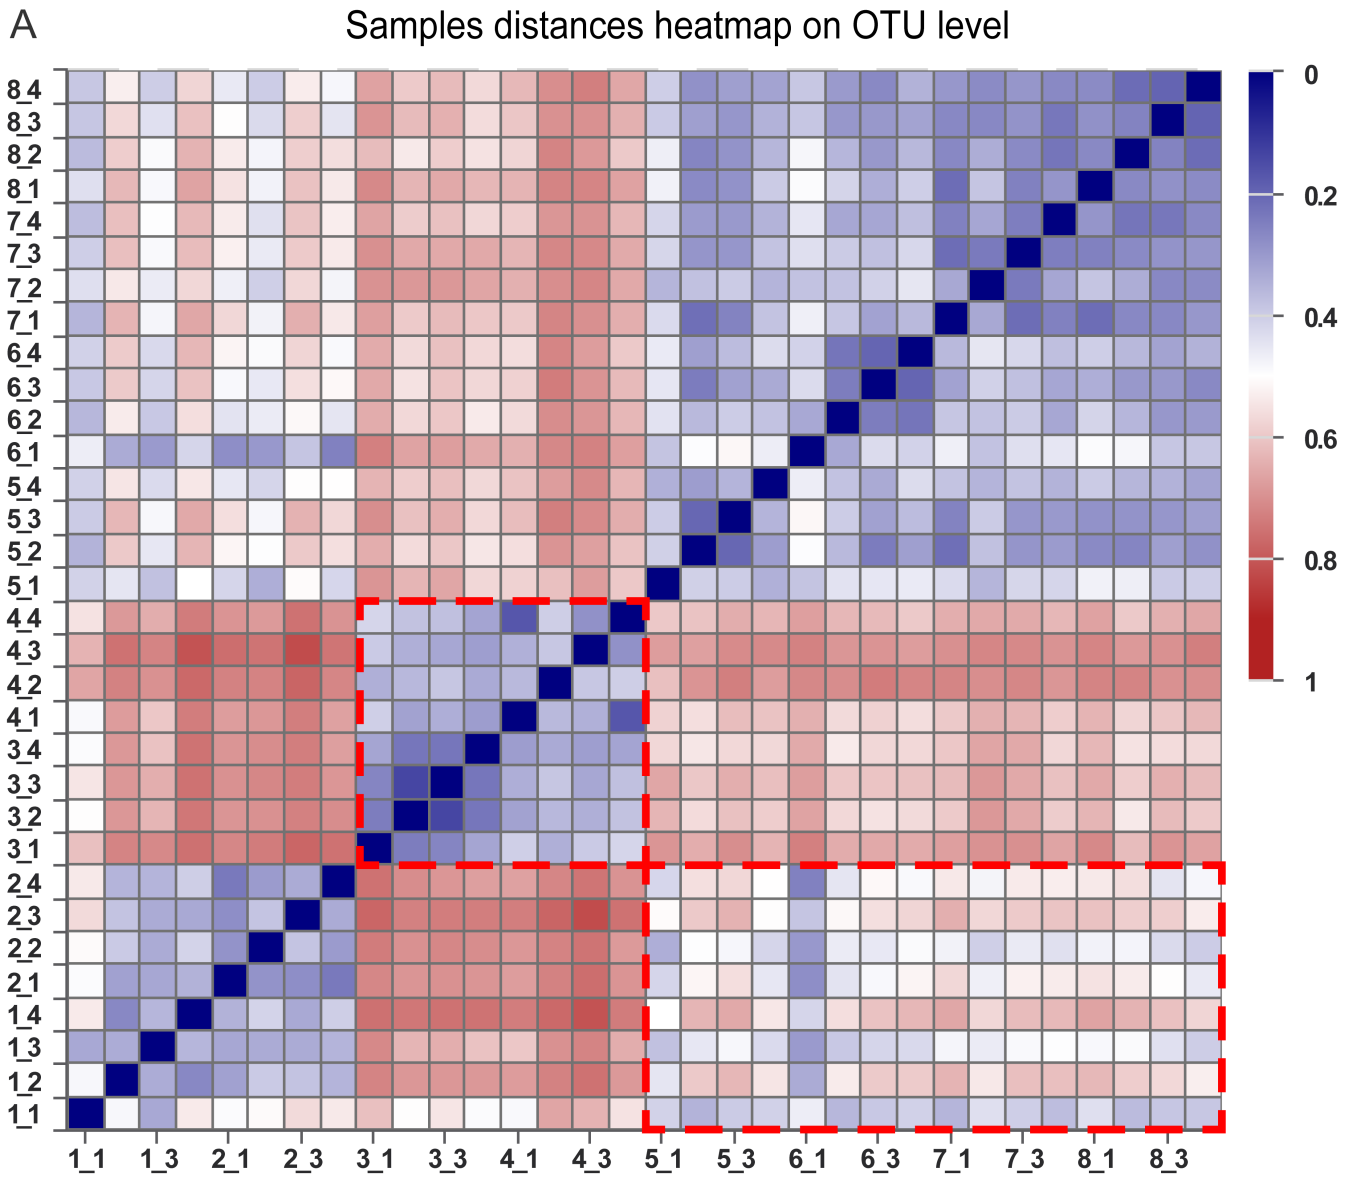

Fig. S2

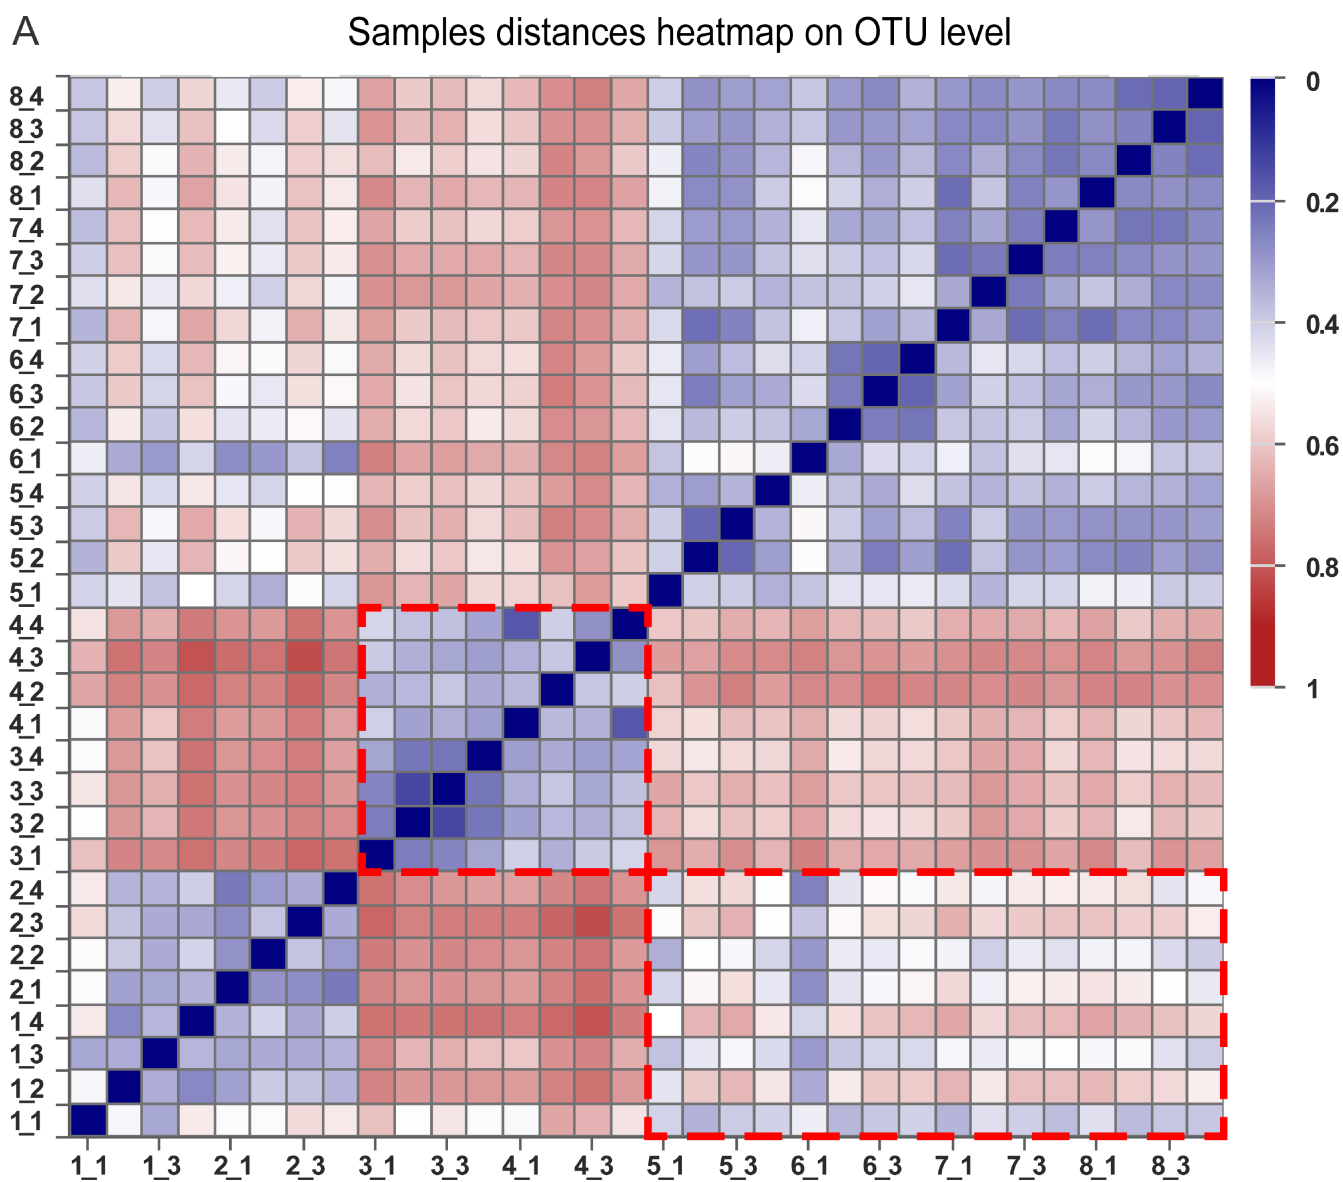

Supplement: bmjdrc-2019-000717supp003.pdf [file bmjdrc-2019-000717supp003.pdf]

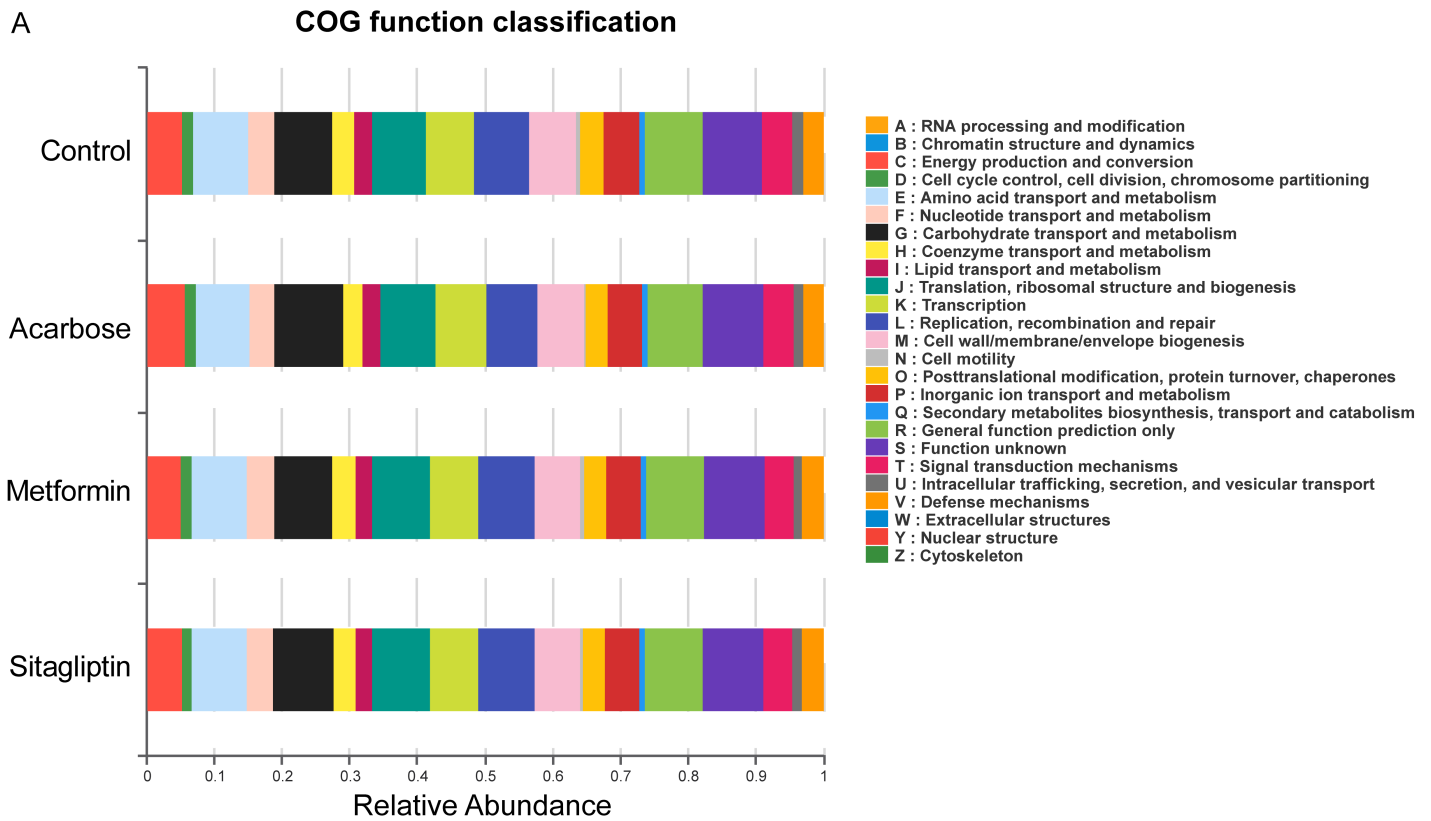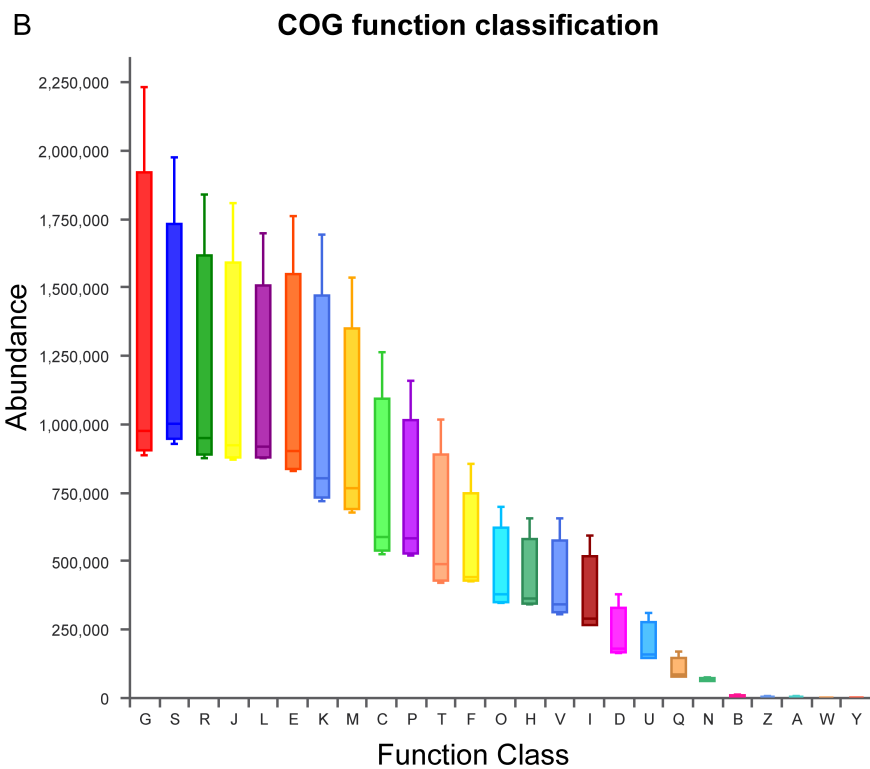

Fig. S3

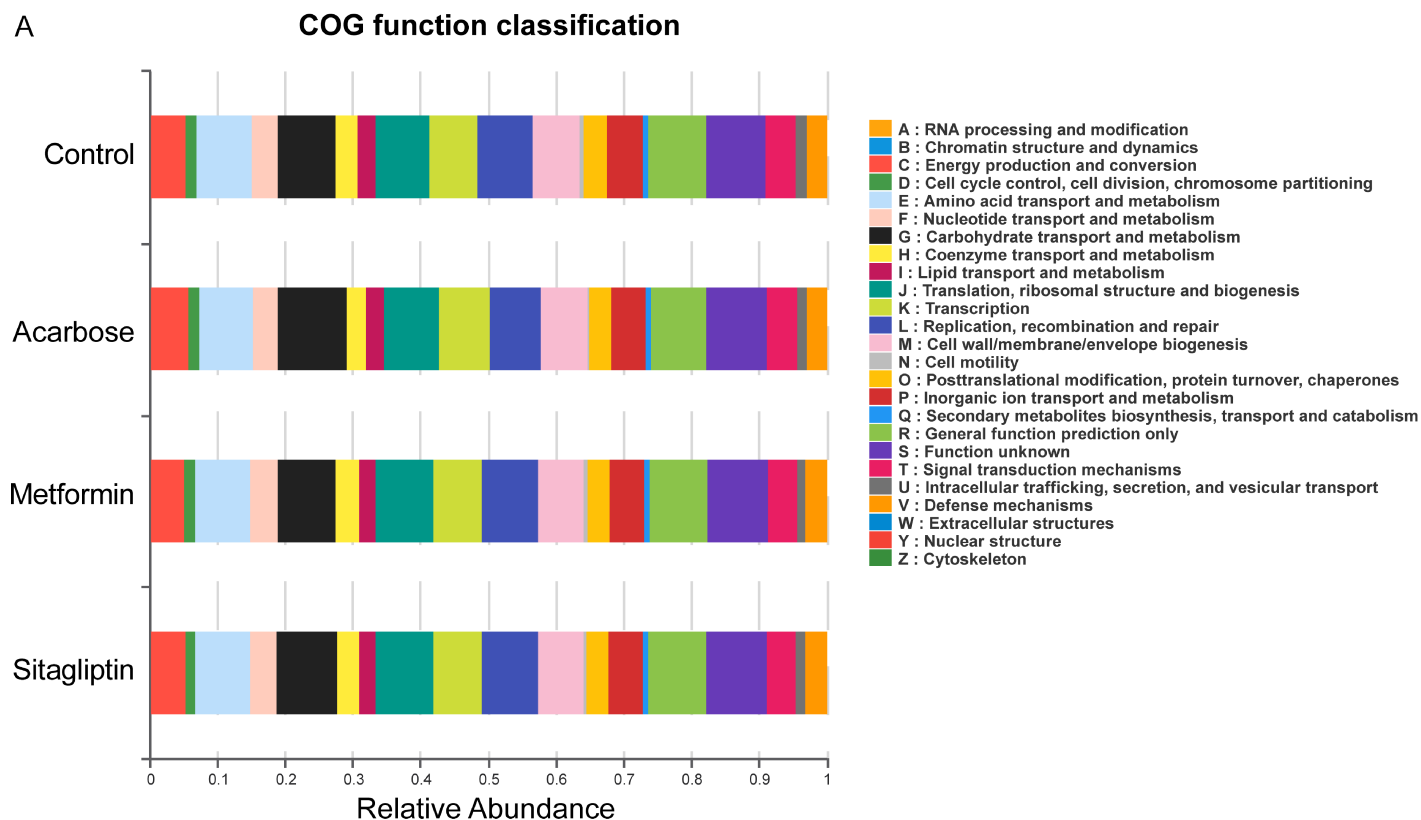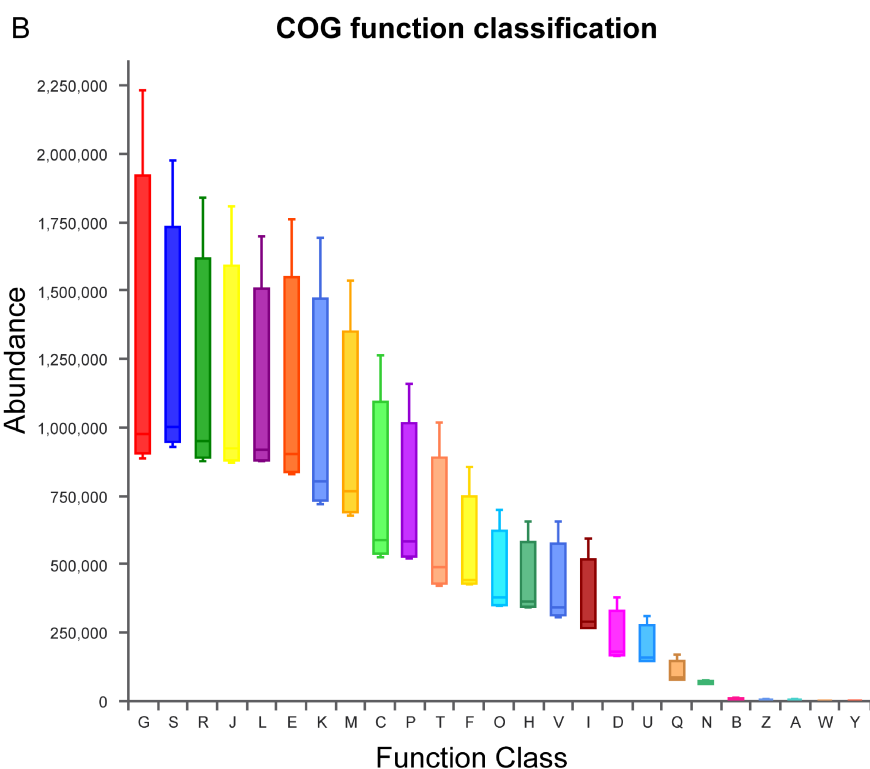

Supplement: bmjdrc-2019-000717supp004.pdf [file bmjdrc-2019-000717supp004.pdf]
